# Supplementary material for: R4 RGS proteins suppress engraftment of human hematopoietic stem/progenitor cells by modulating SDF-1/CXCR4 signaling
Source: PubMed Central journal article supplement — Blood Adv. 2021 Nov 1;5(21):4380–92. doi: 10.1182/bloodadvances.2020003307 (PMC8579266; doi:10.1182/bloodadvances.2020003307), 2021-11-01
Supplement: advancesADV2020003307-suppl1.pdf [file advancesADV2020003307-suppl1.pdf]

**Supplemental Table 1. Key materials**

| <b>Reagent or resource</b>                                            | <b>Source</b>       | <b>Identifier</b>     |
|-----------------------------------------------------------------------|---------------------|-----------------------|
| <i>Stem cell isolation, culture, transduction and electroporation</i> |                     |                       |
| Cas9 nuclease                                                         | Integrated DNA Tech | Cat#: 1081059         |
| Ficoll-Paque Plus                                                     | GE Healthcare       | Cat#: 17-1440-02      |
| Indirect CD34 Microbead Kit                                           | Miltenyi Biotec     | Cat#: 130-046-701     |
| Retronectin                                                           | Takara Bio Inc      | Cat#: T100B           |
| Stemline II HSC Expansion Medium                                      | Sigma-Aldrich       | Cat#: S0192           |
| <i>Cytokines, complements and inhibitors</i>                          |                     |                       |
| AMD3100                                                               | Sigma-Aldrich       | Cat#: A5602           |
| C-C motif chemokine ligand 1 (CCL1)                                   | R&D Systems         | Cat#: 272-I/CF        |
| Complement component 3a (C3a)                                         | R&D Systems         | Cat#: 3677-C3         |
| Complement component 5a (C5a)                                         | R&D Systems         | Cat#: 2037-C5         |
| Fms-related tyrosine kinase 3 ligand (Flt3-L)                         | Miltenyi Biotec     | Cat#: 130-096-479     |
| Pertussis toxin (PTX)                                                 | Sigma-Aldrich       | Cat#: P7208           |
| Stem cell factor (SCF)                                                | Miltenyi Biotec     | Cat#: 130-093-991     |
| Stromal cell-derived factor-1 (SDF-1)                                 | R&D Systems         | Cat#: 350-NS/CF       |
| Thrombopoietin (TPO)                                                  | Miltenyi Biotec     | Cat#: 130-094-011     |
| Tumor necrosis factor (TNF- $\alpha$ )                                | PeproTech           | Cat#: 300-01A         |
| <i>Quantitative PCR</i>                                               |                     |                       |
| High Capacity cDNA RT Kit                                             | Applied Biosystems  | Cat#: 4368814         |
| RNeasy Micro Kit                                                      | Qiagen              | Cat#: 74004           |
| Taqman Gene Expression Master Mix                                     | Applied Biosystems  | Cat#: 4369016         |
| TRIzol reagent                                                        | Invitrogen          | Cat#: 15596026        |
| <i>Taqman assays</i>                                                  |                     |                       |
| C-C motif chemokine ligand 1                                          | Applied Biosystems  | CCL1; Hs00171072_m1   |
| Coagulation factor II thrombin receptor like 2                        | Applied Biosystems  | F2RL2; Hs00187982_m1  |
| Complement component 3a receptor 1                                    | Applied Biosystems  | C3AR1; Hs00377780_m1  |
| Complement component 5a receptor 1                                    | Applied Biosystems  | C5AR1; Hs00383718_m1  |
| Complement component 5a receptor 2                                    | Applied Biosystems  | C5AR2; Hs00218495_m1  |
| Cyclin A1                                                             | Applied Biosystems  | CCNA1; Hs00171105_m1  |
| Glyceraldehyde-3-phosphate dehydrogenase                              | Applied Biosystems  | GAPDH; Hs99999905_m1  |
| Heparanase                                                            | Applied Biosystems  | HPSE; Hs00935036_m1   |
| Interleukin 1 receptor like 1                                         | Applied Biosystems  | IL1RL1; Hs00249384_m1 |
| Lysophosphatidic acid receptor 5                                      | Applied Biosystems  | LPAR5; Hs01051307_m1  |
| Matrix metalloproteinase 14                                           | Applied Biosystems  | MMP14; Hs00237119_m1  |
| Protein S, alpha                                                      | Applied Biosystems  | PROS1; Hs00165590_m1  |
| Regulator of G-protein signaling 1                                    | Applied Biosystems  | RGS1; Hs00175260_m1   |
| Regulator of G-protein signaling 2                                    | Applied Biosystems  | RGS2; Hs00180054_m1   |
| Regulator of G-protein signaling 3                                    | Applied Biosystems  | RGS3; Hs00367777_m1   |
| Regulator of G-protein signaling 4                                    | Applied Biosystems  | RGS4; Hs00194501_m1   |

|                                        |                     |                         |
|----------------------------------------|---------------------|-------------------------|
| Regulator of G-protein signaling 5     | Applied Biosystems  | RGS5; Hs00186212_m1     |
| Regulator of G-protein signaling 8     | Applied Biosystems  | RGS8; Hs00364277_m1     |
| Regulator of G-protein signaling 13    | Applied Biosystems  | RGS13; Hs00243182_m1    |
| Regulator of G-protein signaling 16    | Applied Biosystems  | RGS16; Hs00892674_m1    |
| Regulator of G-protein signaling 18    | Applied Biosystems  | RGS18; Hs00329468_m1    |
| Regulator of G-protein signaling 21    | Applied Biosystems  | RGS21; Hs00982207_m1    |
| Secreted phosphoprotein 1              | Applied Biosystems  | SPP1; Hs00959010_m1     |
| Thrombospondin 1                       | Applied Biosystems  | THBS1; Hs00962908_m1    |
| TIMP metalloproteinase inhibitor 3     | Applied Biosystems  | TIMP3; Hs00165949_m1    |
| <i>Single-guide RNA</i>                |                     |                         |
| AAVS1                                  | Synthego            | GGGGCCACUAGGGACAGGAU    |
| RGS1                                   | Synthego            | AAUGAAAUCUCCAAGUCCA     |
| RGS13                                  | Synthego            | CGAGAAUAUCAAUUCUGGA     |
| RGS16                                  | Synthego            | CAGAGCUGGGCUGCGAUACU    |
| <i>Western blotting</i>                |                     |                         |
| Anti-GAPDH (rabbit monoclonal/14C10)   | Cell Signaling Tech | Cat#: 2118S; 1:1000     |
| Anti-RGS1 (rabbit polyclonal)          | Invitrogen          | Cat#: PA5-29579; 1:1000 |
| Anti-RGS2 (rabbit polyclonal)          | Invitrogen          | Cat#: PA5-28162; 1:1000 |
| Anti-RGS13 (rabbit polyclonal)         | Invitrogen          | Cat#: PA5-22291; 1:1000 |
| Anti-RGS16 (rabbit polyclonal)         | ABclonal            | Cat#: A4078; 1:1000     |
| Goat-anti-rabbit HRP                   | Cell Signaling Tech | Cat#: 7074S; 1:5000     |
| Protease inhibitor cocktail            | Roche Diagnostics   | Cat#: 11836170001       |
| RIPA buffer                            | Sigma-Aldrich       | Cat#: R0278             |
| SignalFire Elite ECL Reagent           | Cell Signaling Tech | Cat#: 12757S            |
| <i>Functional assays</i>               |                     |                         |
| 7-AAD                                  | BD Biosciences      | Cat#: 555816            |
| Annexin V-APC                          | BD Biosciences      | Cat#: 550475            |
| Annexin V binding buffer               | BD Biosciences      | Cat#: 51-66121E         |
| Bovine serum albumin                   | Sigma-Aldrich       | Cat#: A3059             |
| CellTracker Deep Red                   | Molecular Probes    | Cat#: C34565            |
| CellTracker Orange CMRA                | Molecular Probes    | Cat#: C34551            |
| Fetal bovine serum                     | Gibco               | Cat#: 10473028          |
| Fibronectin                            | Gibco               | Cat#: 33016015          |
| Fixation/Permeabilization Solution Kit | BD Biosciences      | Cat#: 554714            |
| Fluo-3AM                               | Molecular Probes    | Cat#: F14218            |
| Hank's Balanced Salt Solution          | Gibco               | Cat#: 14175095          |
| HEPES                                  | Gibco               | Cat#: 15630080          |
| Iscove's Modified Dulbecco's Medium    | Gibco               | Cat#: 12440053          |
| Matrigel                               | BD Biosciences      | Cat#: 354234            |
| MethoCult H4434 Classic                | Stem Cell Tech      | Cat#: 04444             |
| Phalloidin-AF647                       | Molecular Probes    | Cat#: A22287            |

|                                             |                     |                                                                       |
|---------------------------------------------|---------------------|-----------------------------------------------------------------------|
| Pluronic acid                               | Molecular Probes    | Cat#: P3000MP                                                         |
| VLA4 blocking antibody                      | BD Biosciences      | Cat#: 555501; clone 9F10                                              |
| <i>Flow cytometry antibodies</i>            |                     |                                                                       |
| FcR Blocking Reagent, Human                 | Miltenyi Biotec     | Cat#: 130-059-901                                                     |
| Human AKT (pS473)-AF647                     | BD Biosciences      | Cat#: 560343; clone M89-61                                            |
| Human C3AR1-APC                             | BioLegend           | Cat#: 345805; clone hC3aRZ8                                           |
| Human C5AR1-APC                             | BioLegend           | Cat#: 344309; clone S5/1                                              |
| Human CD19-PE                               | BD Biosciences      | Cat#: 555413; clone HIB19                                             |
| Human CD33-PE                               | BD Biosciences      | Cat#: 555450; clone WM53                                              |
| Human CD34-FITC                             | BD Biosciences      | Cat#: 348053; clone 8G12                                              |
| Human CD34-PE                               | BD Biosciences      | Cat#: 560941; clone 581                                               |
| Human CD45-APC                              | Beckman Coulter     | Cat#: IM2473U; clone J.33                                             |
| Human CD71-PE                               | BD Bioscience       | Cat#: 555537; clone M-A712                                            |
| Human CXCR4-APC                             | BD Biosciences      | Cat#: 555976; clone 12G5                                              |
| Human CXCR7-APC                             | BioLegend           | Cat#: 391405; clone 10D1-J16                                          |
| Human ERK1/2 (pT202/pY204)-AF647            | BD Biosciences      | Cat#: 612593; clone 20A                                               |
| Human MMP14-APC                             | R&D Systems         | Cat#: FAB9181A; clone 128527                                          |
| Human STAT3 (pS727)-AF647                   | BD Biosciences      | Cat#: 558099; clone 49/pStat3                                         |
| Mouse CD16/CD32                             | BD Biosciences      | Cat#: 553140; clone 2.4G2                                             |
| <i>Special culturewares</i>                 |                     |                                                                       |
| High-binding 96-well plates                 | Corning             | Cat#: 9018                                                            |
| Non-TC treated 6-well plates                | Falcon              | Cat#: 351146                                                          |
| Transwells 6.5-mm diameter; 5- $\mu$ m pore | Corning             | Cat#: 3421                                                            |
| <i>Softwares</i>                            |                     |                                                                       |
| FlowJo                                      | TreeStar            | v10.4                                                                 |
| GeneChip Operating Software                 | Affymetrix          | <a href="https://www.affymetrix.com/">https://www.affymetrix.com/</a> |
| ICE CRISPR Analysis Tool                    | Synthego            | <a href="https://synthego.com/">https://synthego.com/</a>             |
| Image J                                     | NIH                 | <a href="https://imagej.nih.gov/ij">https://imagej.nih.gov/ij</a>     |
| MetaCore                                    | Clarivate Analytics | <a href="https://portal.genego.com/">https://portal.genego.com/</a>   |
| Partek Genomics Suite                       | Partek              | v6.5                                                                  |
| SPSS                                        | IBM Corporation     | v21.0                                                                 |

**Supplemental Table 2. GO analyses of genes exclusively altered by specific RGS members**

| <b><i>RGS1</i></b>  |                                                                                           |                       |            |
|---------------------|-------------------------------------------------------------------------------------------|-----------------------|------------|
| <b>#</b>            | <b>Processes</b>                                                                          | <b><i>P</i> value</b> | <b>FDR</b> |
| 1                   | Regulation of interleukin-5 production                                                    | 1.48E-07              | 7.77E-05   |
| 2                   | Immune system process                                                                     | 1.56E-05              | 4.09E-03   |
| 3                   | Inflammatory response                                                                     | 7.66E-05              | 1.33E-02   |
| 4                   | Defense response                                                                          | 1.97E-04              | 1.81E-02   |
| 5                   | Cellular response to cytokine stimulus                                                    | 2.62E-04              | 1.81E-02   |
| 6                   | Positive regulation of microglial cell migration                                          | 3.46E-04              | 1.81E-02   |
| 7                   | Positive regulation of response to macrophage colony-stimulating factor                   | 3.46E-04              | 1.81E-02   |
| 8                   | Positive regulation of macrophage colony-stimulating factor signaling pathway             | 3.46E-04              | 1.81E-02   |
| 9                   | Mammary gland fat development                                                             | 3.46E-04              | 1.81E-02   |
| 10                  | Positive regulation of cellular response to macrophage colony-stimulating factor stimulus | 3.46E-04              | 1.81E-02   |
| <b><i>RGS13</i></b> |                                                                                           |                       |            |
| <b>#</b>            | <b>Processes</b>                                                                          | <b><i>P</i> value</b> | <b>FDR</b> |
| 1                   | Oxygen transport                                                                          | 5.96E-09              | 1.31E-05   |
| 2                   | Gas transport                                                                             | 4.04E-08              | 4.46E-05   |
| 3                   | Nucleosome assembly                                                                       | 8.06E-08              | 5.92E-05   |
| 4                   | Protein heterooligomerization                                                             | 1.29E-07              | 7.11E-05   |
| 5                   | Chromatin assembly                                                                        | 2.07E-07              | 9.16E-05   |
| 6                   | Nucleosome organization                                                                   | 4.25E-07              | 1.56E-04   |
| 7                   | Chromatin assembly or disassembly                                                         | 7.02E-07              | 2.21E-04   |
| 8                   | Defense response to bacterium                                                             | 1.09E-06              | 3.00E-04   |
| 9                   | DNA packaging                                                                             | 2.17E-06              | 5.32E-04   |
| 10                  | Protein-DNA complex assembly                                                              | 3.96E-06              | 8.21E-04   |
| <b><i>RGS16</i></b> |                                                                                           |                       |            |
| <b>#</b>            | <b>Processes</b>                                                                          | <b><i>P</i> value</b> | <b>FDR</b> |
| 1                   | Postsynaptic neurotransmitter receptor internalization                                    | 2.05E-06              | 1.54E-03   |
| 2                   | Dynamin family protein polymerization involved in mitochondrial fission                   | 1.22E-05              | 1.85E-03   |
| 3                   | Synaptic vesicle budding from presynaptic endocytic zone membrane                         | 1.22E-05              | 1.85E-03   |
| 4                   | Dynamin family protein polymerization involved in membrane fission                        | 1.22E-05              | 1.85E-03   |
| 5                   | Sperm ejaculation                                                                         | 1.22E-05              | 1.85E-03   |
| 6                   | Negative regulation of dendritic spine morphogenesis                                      | 1.87E-05              | 2.36E-03   |
| 7                   | Synaptic vesicle budding                                                                  | 2.24E-05              | 2.42E-03   |
| 8                   | Membrane fission                                                                          | 2.65E-05              | 2.50E-03   |
| 9                   | Neurotransmitter receptor internalization                                                 | 3.57E-05              | 2.99E-03   |
| 10                  | Insemination                                                                              | 7.84E-05              | 5.89E-03   |

**Supplemental Table 3. Array data of 36 differentially expressed transcripts commonly regulated by RGS1/13/16**

| Column ID | Gene Assignment                                                                          | Gene Symbol  | Fold change (RGS1 vs. CTRL) | P value (RGS1 vs. CTRL) | Fold change (RGS13 vs. CTRL) | P value (RGS13 vs. CTRL) | Fold change (RGS16 vs. CTRL) | P value (RGS16 vs. CTRL) |
|-----------|------------------------------------------------------------------------------------------|--------------|-----------------------------|-------------------------|------------------------------|--------------------------|------------------------------|--------------------------|
| 16980245  | NM_198682 // GYPE // glycophorin E (MNS blood group) // 4q31.1 // 2996 /// ENST00000358  | GYPE         | 1.712                       | 0.008                   | 1.700                        | 0.008                    | 1.606                        | 0.015                    |
| 16760516  | NM_001142961 // LPAR5 // lysophosphatidic acid receptor 5 // 12p13.31 // 57121 /// NM_0  | LPAR5        | -1.525                      | 0.000                   | -1.513                       | 0.000                    | -1.583                       | 0.000                    |
| 16782054  | ENST00000390502 // TRAJ35 // T cell receptor alpha joining 35 (non-functional) // --- /  | TRAJ35       | -1.591                      | 0.042                   | -1.720                       | 0.021                    | -1.561                       | 0.050                    |
| 16690881  | NR_034126 // LINC01160 // long intergenic non-protein coding RNA 1160 // 1p13.2 // 1001  | LINC01160    | -1.627                      | 0.005                   | -1.697                       | 0.003                    | -1.650                       | 0.005                    |
| 16722081  | NM_001282663 // MICAL2 // microtubule associated monooxygenase, calponin and LIM domain  | MICAL2       | -1.634                      | 0.021                   | -1.852                       | 0.006                    | -1.616                       | 0.023                    |
| 16679717  | NM_001281834 // GCSAML // germinal center-associated, signaling and motility-like // 1q  | GCSAML       | -1.655                      | 0.000                   | -1.719                       | 0.000                    | -1.547                       | 0.001                    |
| 16855355  | OTTHUMT00000448305 // RP11-839G9.1 // novel transcript, antisense to RAB27B // -- // -   | RP11-839G9.1 | -1.667                      | 0.004                   | -1.580                       | 0.008                    | -1.679                       | 0.004                    |
| 16929442  | NM_000362 // TIMP3 // TIMP metalloproteinase inhibitor 3 // 22q12.3 // 7078 /// uc003anb | TIMP3        | -1.677                      | 0.004                   | -1.739                       | 0.003                    | -1.797                       | 0.002                    |
| 16968680  | NM_001251830 // SPP1 // secreted phosphoprotein 1 // 4q22.1 // 6696 /// ENST00000509659  | SPP1         | -1.693                      | 0.000                   | -1.929                       | 0.000                    | -1.858                       | 0.000                    |
| 16852463  | NM_004163 // RAB27B // RAB27B, member RAS oncogene family // 18q21.2 // 5874 /// ENST00  | RAB27B       | -1.745                      | 0.004                   | -1.615                       | 0.010                    | -1.651                       | 0.008                    |
| 16883690  | NM_003856 // IL1RL1 // interleukin 1 receptor-like 1 // 2q12 // 9173 /// NM_016232 // I  | IL1RL1       | -1.752                      | 0.000                   | -1.509                       | 0.002                    | -1.691                       | 0.000                    |

|          |                                                                                          |        |        |       |        |       |        |       |
|----------|------------------------------------------------------------------------------------------|--------|--------|-------|--------|-------|--------|-------|
| 16977537 | NM_001098540 // HPSE // heparanase // 4q21.3 // 10855 /// NM_001199830 // HPSE // hepar  | HPSE   | -1.763 | 0.000 | -1.513 | 0.000 | -1.561 | 0.000 |
| 17012598 | NM_005021 // ENPP3 // ectonucleotide pyrophosphatase/phosphodiesterase 3 // 6q22 // 516  | ENPP3  | -1.793 | 0.007 | -1.758 | 0.008 | -1.879 | 0.004 |
| 16760889 | NM_004054 // C3AR1 // complement component 3a receptor 1 // 12p13.31 // 719 /// ENST000  | C3AR1  | -1.795 | 0.000 | -1.735 | 0.000 | -1.760 | 0.000 |
| 16863593 | NM_001271749 // C5AR2 // complement component 5a receptor 2 // 19q13.33 // 27202 /// NM  | C5AR2  | -1.797 | 0.000 | -1.991 | 0.000 | -1.723 | 0.000 |
| 16697370 | NM_000963 // PTGS2 // prostaglandin-endoperoxide synthase 2 (prostaglandin G/H synthase  | PTGS2  | -1.813 | 0.004 | -1.692 | 0.009 | -1.736 | 0.007 |
| 16872248 | NM_001828 // CLC // Charcot-Leyden crystal galectin // 19q13.1 // 1178 /// ENST00000221  | CLC    | -1.837 | 0.005 | -1.991 | 0.002 | -1.956 | 0.003 |
| 16901593 | NM_144710 // SEPT10 // septin 10 // 2q13 // 151011 /// NR_047585 // SEPT10 // septin 10  | SEPT10 | -1.845 | 0.001 | -1.500 | 0.019 | -1.673 | 0.005 |
| 17010760 | NM_001204813 // NT5E // 5-nucleotidase, ecto (CD73) // 6q14-q21 // 4907 /// NM_002526 /  | NT5E   | -1.914 | 0.000 | -1.702 | 0.001 | -1.906 | 0.000 |
| 16782187 | ENST00000548162 // MMP14 // matrix metalloproteinase 14 (membrane-inserted) // 14q11.2 / | MMP14  | -1.923 | 0.000 | -1.822 | 0.000 | -1.718 | 0.000 |
| 16984010 | NM_002185 // IL7R // interleukin 7 receptor // 5p13 // 3575 /// ENST00000303115 // IL7R  | IL7R   | -1.925 | 0.010 | -1.634 | 0.039 | -1.823 | 0.015 |
| 16774053 | NM_001111045 // CCNA1 // cyclin A1 // 13q12.3-q13 // 8900 /// NM_003914 // CCNA1 // cyc  | CCNA1  | -1.944 | 0.001 | -1.787 | 0.003 | -1.880 | 0.002 |
| 16956569 | NM_000313 // PROS1 // protein S (alpha) // 3q11.2 // 5627 /// ENST00000394236 // PROS1   | PROS1  | -1.993 | 0.000 | -1.853 | 0.000 | -1.996 | 0.000 |
| 16997383 | NM_004101 // F2RL2 // coagulation factor II (thrombin) receptor-like 2 // 5q13 // 2151   | F2RL2  | -2.079 | 0.009 | -2.043 | 0.011 | -2.100 | 0.008 |

|          |                                                                                         |               |        |       |        |       |         |       |
|----------|-----------------------------------------------------------------------------------------|---------------|--------|-------|--------|-------|---------|-------|
| 16738803 | NM_001062 // TCN1 // transcobalamin I (vitamin B12 binding protein, R binder family) // | TCN1          | -2.107 | 0.003 | -1.679 | 0.024 | -2.318  | 0.001 |
| 16709245 | NM_000681 // ADRA2A // adrenoceptor alpha 2A // 10q25.2 // 150 /// ENST00000280155 // A | ADRA2A        | -2.148 | 0.001 | -2.150 | 0.001 | -2.109  | 0.001 |
| 16694764 | NM_001161441 // SH2D2A // SH2 domain containing 2A // 1q21 // 9047 /// NM_001161442 //  | SH2D2A        | -2.266 | 0.000 | -1.896 | 0.000 | -1.923  | 0.000 |
| 16799315 | NM_003246 // THBS1 // thrombospondin 1 // 15q15 // 7057 /// ENST00000260356 // THBS1 // | THBS1         | -2.391 | 0.024 | -2.405 | 0.023 | -2.510  | 0.018 |
| 16996234 | NM_003711 // PPAP2A // phosphatidic acid phosphatase type 2A // 5q11 // 8611 /// NR_103 | PPAP2A        | -2.440 | 0.000 | -1.971 | 0.000 | -2.055  | 0.000 |
| 16888106 | NM_001201480 // OSBPL6 // oxysterol binding protein-like 6 // 2q32.1 // 114880 /// NM_0 | OSBPL6        | -3.155 | 0.001 | -3.000 | 0.002 | -3.135  | 0.002 |
| 16782122 | AK026255 // YME1L1 // YME1-like 1 ATPase // 10p14 // 10730 /// BC020840 // YME1L1 // YM | YME1L1        | -3.386 | 0.000 | -3.561 | 0.000 | -3.432  | 0.000 |
| 16753630 | OTTHUMT00000401554 // RP11-221N13.3 // novel transcript // --- // --- /// OTTHUMT000004 | RP11-221N13.3 | -3.412 | 0.000 | -2.105 | 0.003 | -2.454  | 0.001 |
| 16754895 | ENST00000550879 // NTS // neurotensin // 12q21 // 4922 /// OTTHUMT00000406112 // NTS // | NTS           | -3.788 | 0.008 | -3.447 | 0.012 | -3.342  | 0.014 |
| 16863589 | NM_001736 // C5AR1 // complement component 5a receptor 1 // 19q13.3-q13.4 // 728 /// EN | C5AR1         | -3.991 | 0.000 | -3.125 | 0.000 | -3.522  | 0.000 |
| 16843309 | NM_002981 // CCL1 // chemokine (C-C motif) ligand 1 // 17q12 // 6346 /// ENST0000022584 | CCL1          | -6.169 | 0.000 | -5.511 | 0.000 | -5.611  | 0.000 |
| 16659637 | NM_015849 // CELA2B // chymotrypsin-like elastase family, member 2B // 1p36.21 // 51032 | CELA2B        | -9.528 | 0.000 | -6.691 | 0.000 | -10.214 | 0.000 |

**Supplemental Table 4. Selected genes commonly regulated by RGS1/13/16 and their reported functions in hematopoietic cells**

| <b>Gene Symbol</b>               | <b>Description</b>                                         | <b>Roles in cell trafficking or hematopoiesis</b>                                                                                                                                                                                                                                                                                | <b>References</b>                             |
|----------------------------------|------------------------------------------------------------|----------------------------------------------------------------------------------------------------------------------------------------------------------------------------------------------------------------------------------------------------------------------------------------------------------------------------------|-----------------------------------------------|
| <i>C3AR1</i>                     | Complement C3a Receptor 1                                  | <ul style="list-style-type: none"> <li>• C3a potentiates SDF-1-directed chemotaxis, primes trans-Matrigel migration, stimulates MMP-9 secretion and promotes VLA-4-mediated adhesion to VCAM-1 in human CD34<sup>+</sup> cells</li> <li>• C3a priming enhances engraftment kinetics of murine Sca-1<sup>+</sup> cells</li> </ul> | Reca <i>et al.</i> , 2003 <sup>1</sup>        |
|                                  |                                                            | <ul style="list-style-type: none"> <li>• G-CSF-induced HSPC mobilization is enhanced in C3aR<sup>-/-</sup> mice</li> <li>• C3aR antagonist SB 290157 accelerates G-CSF-induced HSPC mobilization</li> </ul>                                                                                                                      | Ratajczak <i>et al.</i> , 2004 <sup>2</sup>   |
|                                  |                                                            | <ul style="list-style-type: none"> <li>• HSPCs from C3aR<sup>-/-</sup> mice exhibit defective homing and engraftment</li> <li>• Pharmacologic inhibition of C3aR impairs homing of human CD34<sup>+</sup> cells</li> </ul>                                                                                                       | Wysoczynski <i>et al.</i> , 2009 <sup>3</sup> |
| <i>C5AR1</i><br><br><i>C5AR2</i> | Complement C5a Receptor 1<br><br>Complement C5a Receptor 2 | <ul style="list-style-type: none"> <li>• C5<sup>-/-</sup> mice exhibits impaired G-CSF-induced HSPC mobilization</li> <li>• C5a stimulates C5aR<sup>+</sup> granulocytes to produce MMP-9 and secretes cationic peptides that enhances responsiveness of murine HSPCs to plasma SDF-1 gradient</li> </ul>                        | Lee <i>et al.</i> , 2009 <sup>4</sup>         |
|                                  |                                                            | <ul style="list-style-type: none"> <li>• Plasma C5a level is higher in good mobilizers and correlates with the number of mobilized CD34<sup>+</sup> cells</li> <li>• Stimulation of human granulocytes and monocytes with C5a increases MMP-9 secretion and MT1-MMP expression that may facilitate HSPC egress</li> </ul>        | Jalili <i>et al.</i> , 2010 <sup>5</sup>      |
| <i>CCL1</i>                      | C-C Motif Chemokine Ligand 1                               | <ul style="list-style-type: none"> <li>• CCL1 is required for pulmonary recruitment of eosinophils in a murine model of allergic airway disease</li> </ul>                                                                                                                                                                       | Bishop and Lloyd, 2003 <sup>6</sup>           |



|              |                                                |                                                                                                                                                                                                                                                                                                                                                                                                            |                                             |
|--------------|------------------------------------------------|------------------------------------------------------------------------------------------------------------------------------------------------------------------------------------------------------------------------------------------------------------------------------------------------------------------------------------------------------------------------------------------------------------|---------------------------------------------|
|              |                                                | <ul style="list-style-type: none"> <li>• CCL1/CCR8 axis regulates skin homing of human T cells for immune surveillance</li> </ul>                                                                                                                                                                                                                                                                          | Schaerli <i>et al.</i> , 2004 <sup>7</sup>  |
|              |                                                | <ul style="list-style-type: none"> <li>• CD4<sup>+</sup> T cells produces CCL1 that recruits and activates murine macrophages in type I diabetes</li> </ul>                                                                                                                                                                                                                                                | Cantor and Haskins, 2007 <sup>8</sup>       |
| <i>F2RL2</i> | Coagulation Factor II Thrombin Receptor Like 2 | <ul style="list-style-type: none"> <li>• LPS-matured human dendritic cells expressed F2RL2 (PAR3) that mediates ERK1/2- and Rho kinase 1-dependent chemotaxis</li> </ul>                                                                                                                                                                                                                                   | Li <i>et al.</i> , 2008 <sup>9</sup>        |
| <i>PROS1</i> | Protein S                                      | <ul style="list-style-type: none"> <li>• Exogenous Protein S inhibits VEGF-A-induced migration and activation of ERK1/2 and Akt in human endothelial cells</li> </ul>                                                                                                                                                                                                                                      | Fraineau <i>et al.</i> , 2012 <sup>10</sup> |
| <i>THBS1</i> | Thrombospondin 1                               | <ul style="list-style-type: none"> <li>• Endogenous THBS1 acts as a ligand of LRP1 and CRT for regulation of T cell adhesion</li> </ul>                                                                                                                                                                                                                                                                    | Li <i>et al.</i> , 2006 <sup>11</sup>       |
|              |                                                | <ul style="list-style-type: none"> <li>• Monocytic cells from THBS1<sup>-/-</sup> mice display reduced migration to MCP-1 and adhesion to fibronectin</li> </ul>                                                                                                                                                                                                                                           | Liu <i>et al.</i> , 2015 <sup>12</sup>      |
| <i>MMP14</i> | Matrix Metalloproteinase 14                    | <ul style="list-style-type: none"> <li>• MMP14 (MT1-MMP) expression positively correlates with the level of human CD34<sup>+</sup> cells in G-CSF-mobilized peripheral blood</li> <li>• Antibody or siRNA targeting MMP14 decreases trans-Matrigel migration and homing of CD34<sup>+</sup> cells in NOD/SCID mice</li> <li>• HSPCs from MMP14<sup>-/-</sup> mice exhibit defective engraftment</li> </ul> | Vagima <i>et al.</i> , 2009 <sup>13</sup>   |
|              |                                                | <ul style="list-style-type: none"> <li>• MMP14<sup>-/-</sup> mice display severe pancytopenia and reduced secretion of SCF, SDF-1 and IL-7 in the BM niche</li> </ul>                                                                                                                                                                                                                                      | Nishida <i>et al.</i> , 2012 <sup>14</sup>  |
| <i>TIMP3</i> | Tissue Inhibitor of Metalloproteinases 3       | <ul style="list-style-type: none"> <li>• TIMP-3 enhances murine HSPC proliferation by stimulating cell-cycle entry which is independent of its metalloproteinase inhibitory activity</li> <li>• BM recovery from myelosuppression is impaired in TIMP3<sup>-/-</sup> mice</li> </ul>                                                                                                                       | Nakajima <i>et al.</i> 2010 <sup>15</sup>   |

|               |                                  |                                                                                                                                                                                                                                                  |                                                  |
|---------------|----------------------------------|--------------------------------------------------------------------------------------------------------------------------------------------------------------------------------------------------------------------------------------------------|--------------------------------------------------|
|               |                                  | <ul style="list-style-type: none"> <li>Overexpression of TIMP-3 increases murine HSPC proliferation <i>in vivo</i> and enhances colony-forming cell trafficking to blood and spleen</li> </ul>                                                   | Shen <i>et al.</i> , 2010 <sup>16</sup>          |
| <i>CCNA1</i>  | Cyclin A1                        | <ul style="list-style-type: none"> <li>Conditional deletion of Cyclin A1/A2 induces severe anemia and reduces the reconstitution potential of murine HSPCs</li> </ul>                                                                            | Kalaszczynska <i>et al.</i> , 2009 <sup>17</sup> |
|               |                                  | <ul style="list-style-type: none"> <li>Loss of cyclin A1 increases murine HSPC migration and homing to the BM niche</li> </ul>                                                                                                                   | Miftakhova <i>et al.</i> , 2015 <sup>18</sup>    |
| <i>HSPE</i>   | Heparanase                       | <ul style="list-style-type: none"> <li>Transgenic mice overexpressing heparanase exhibits increased retention of HSPCs in the BM through enhancement of SDF-1 turnover and reduction of protease activity</li> </ul>                             | Spiegel <i>et al.</i> , 2008 <sup>19</sup>       |
| <i>IL1RL1</i> | Interleukin 1 Receptor Like 1    | <ul style="list-style-type: none"> <li>IL-33 primes migration of human CD34<sup>+</sup> cells to SDF-1 and homing to the lungs in patients with allergic asthma, which can be abolished by antibodies against IL1RL1 (IL33R, ST2)</li> </ul>     | Smith <i>et al.</i> , 2015 <sup>20</sup>         |
| <i>LPAR5</i>  | Lysophosphatidic Acid Receptor 5 | <ul style="list-style-type: none"> <li>Lysophosphatidic acid enhances survival of cord blood CD34<sup>+</sup> cells in hypoxic and serum-deprived cultures through activation of ERK and Akt pathways</li> </ul>                                 | Kostic <i>et al.</i> , 2015 <sup>21</sup>        |
| <i>SPP1</i>   | Secreted Phosphoprotein 1        | <ul style="list-style-type: none"> <li>HSPCs from Osteopontin (SPP1) knockout mice exhibit enhanced cycling and aberrant distribution in the BM niche after transplantation</li> </ul>                                                           | Nilsson <i>et al.</i> , 2005 <sup>22</sup>       |
|               |                                  | <ul style="list-style-type: none"> <li>Thrombin-cleaved osteopontin is chemotactic for human CD34<sup>+</sup> cells and is essential for homing of murine HSPCs</li> <li>Osteopontin knockout mice exhibit elevated HSPC mobilization</li> </ul> | Grassinger <i>et al.</i> 2009 <sup>23</sup>      |

## Supplemental Figure 1

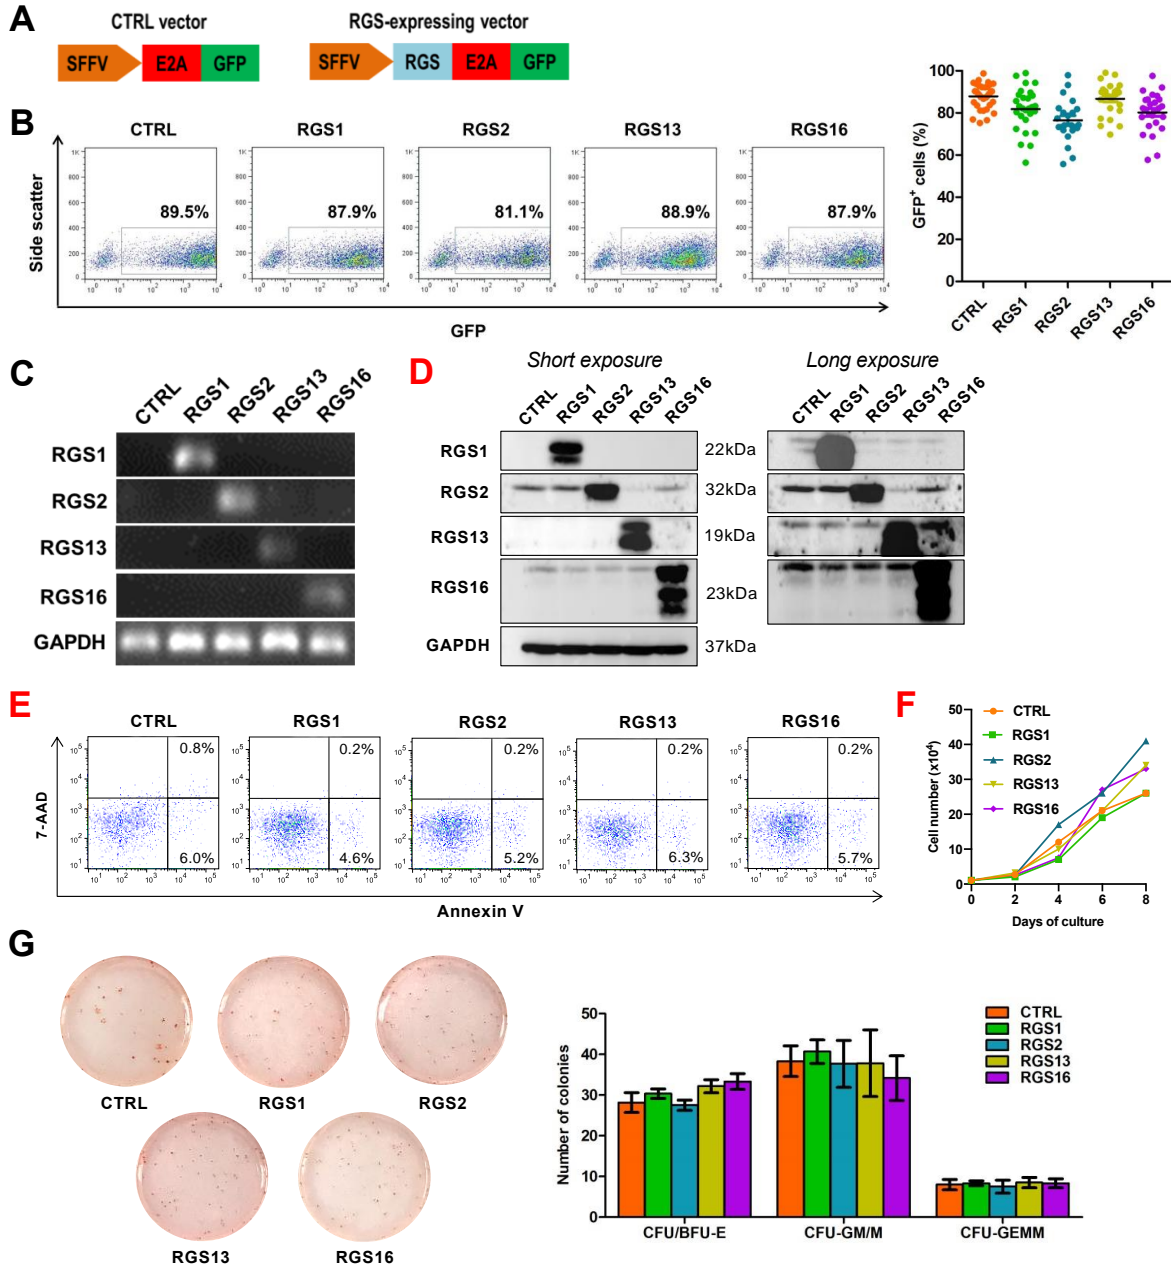

**Supplemental Figure 1. Lentiviral transduction of human CD34<sup>+</sup> cells.** (A) Schematic diagram showing the lentiviral vector backbone for RGS overexpression. SFFV, spleen focus-forming virus U3 promoter; E2A, a self-cleavage site derived from equine rhinitis A virus; GFP, green fluorescence protein. (B) Transduction efficiencies represented by the percentages of GFP<sup>+</sup>

populations (n=21-35). (C) RT-PCR confirmation of specific mRNA expression of RGS members in transduced CD34<sup>+</sup> cells. (D) Protein expression of RGS members in transduced CD34<sup>+</sup> cells revealed by Western blotting. (Left) Images with short exposure showing specific overexpression of RGS members. (Right) Images with long exposure showing their basal expression. (E) Representative flow cytometry plots showing the apoptosis level of transduced CD34<sup>+</sup> cells (n=3). (F) Proliferation of transduced CD34<sup>+</sup> cells was measured by Trypan Blue exclusion over time. (G) Colony forming ability of transduced CD34<sup>+</sup> cells (n=3). Statistics: two-tailed, paired Student's *t*-test. None of the comparisons achieved statistical significance.

## Supplemental Figure 2

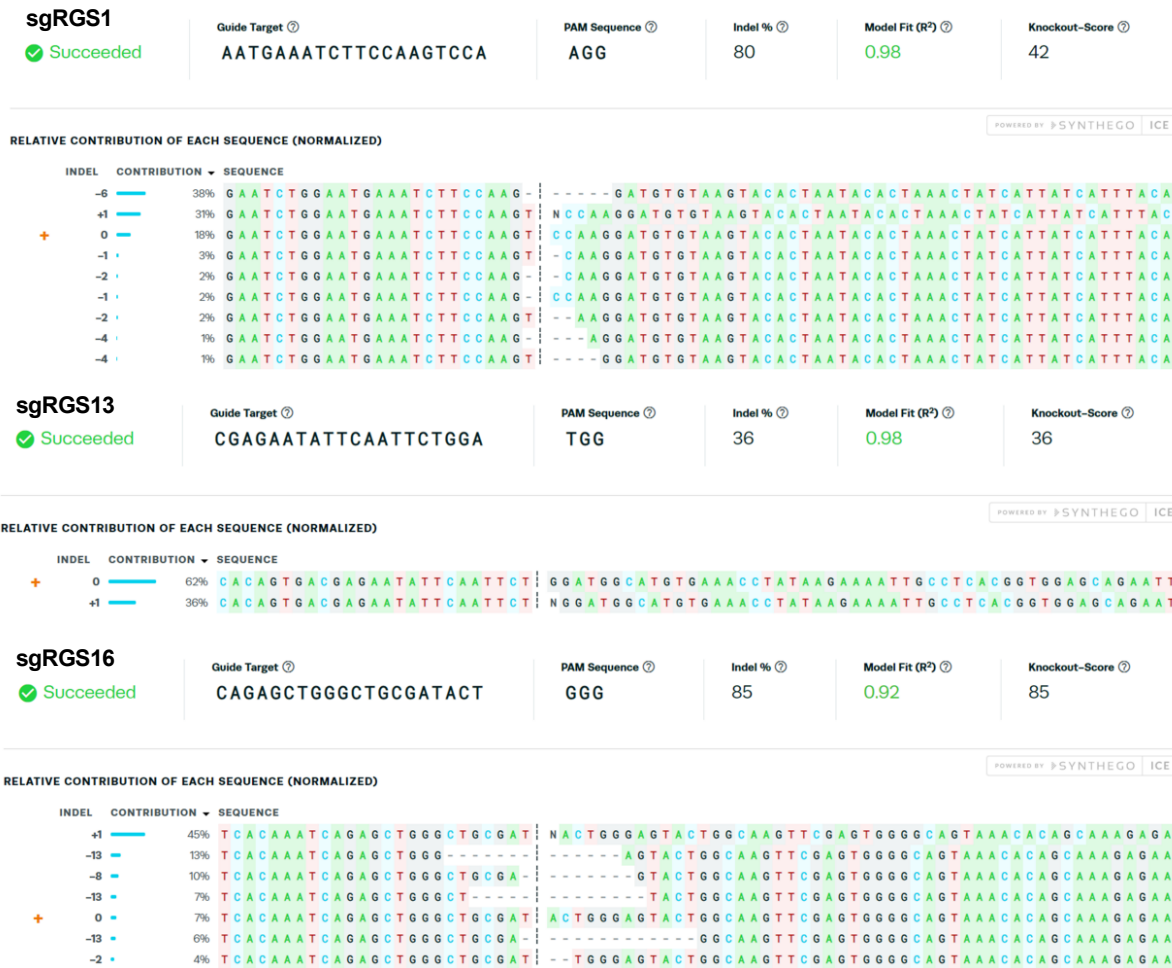

**Supplemental Figure 2. RGS knockout in human CD34<sup>+</sup> cells.** Representative ICE analysis reports on *RGS1*<sup>-</sup>, *RGS13*<sup>-</sup>, and *RGS16*-edited HSPCs. The wild type DNA sequences are indicated as “+”. The black vertical dotted lines represent the cut sites. Indel (insertion or deletion) percentages depict editing efficiencies. KO scores are defined as the inferred proportion of cells likely with a functional knockout.

### Supplemental Figure 3

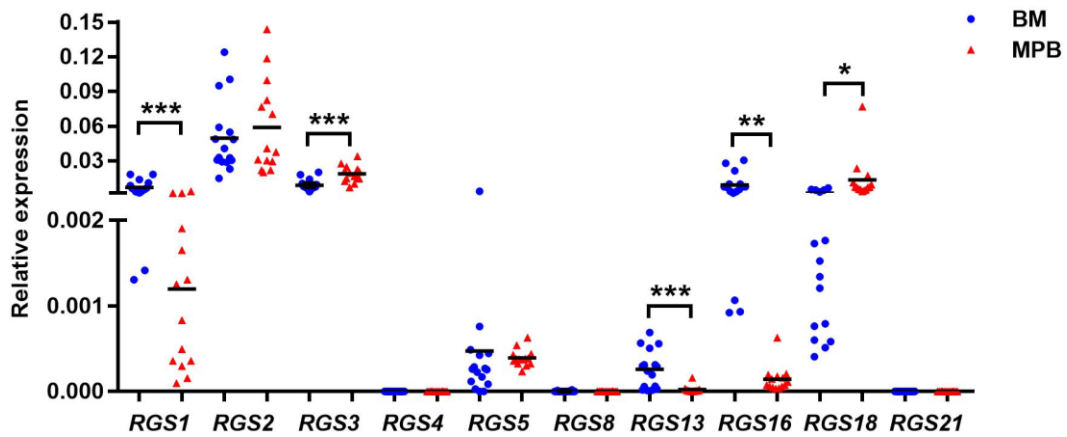

**Supplemental Figure 3. Expression of R4 RGS in BM and MPB CD34<sup>+</sup> cells.** Basal mRNA expression of R4 RGS in CD34<sup>+</sup> cells derived from normal BM (n=16) and G-CSF-mobilized MPB (n=14). Reported values are RGS expression relative to GAPDH. Statistics: two-tailed, unpaired Student's *t*-test. \* $P < 0.05$ , \*\* $P < 0.01$ , \*\*\* $P < 0.001$ .

## Supplemental Figure 4

A

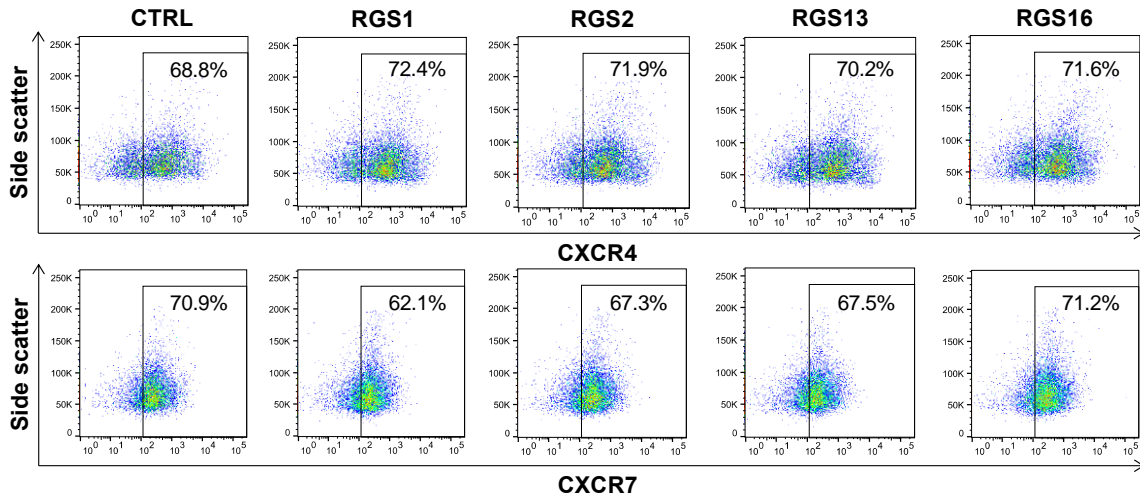

B

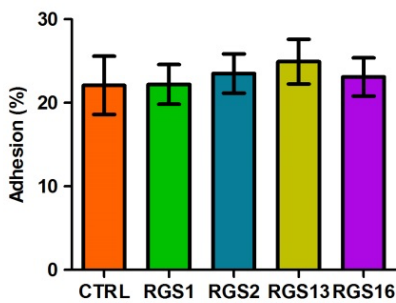

C

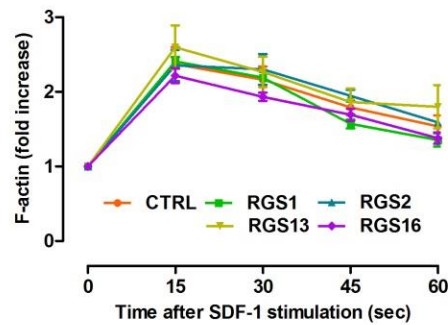

**Supplemental Figure 4. R4 RGS does not affect SDF-1 receptor expression, adhesion and actin polymerization.** (A) Representative flow cytometry plots showing the cell surface CXCR4 and CXCR7 expression on transduced CD34<sup>+</sup> cells. (B) Adhesion of transduced CD34<sup>+</sup> cells to fibronectin in the presence of SDF-1 (n=4). (C) Levels of F-actin in transduced CD34<sup>+</sup> cells following SDF-1 stimulation (n=3). SDF-1 at 100 ng/mL was applied for these functional assays. Statistics: two-tailed, paired Student's *t*-test. None of the comparisons achieved statistical significance.

## Supplemental Figure 5

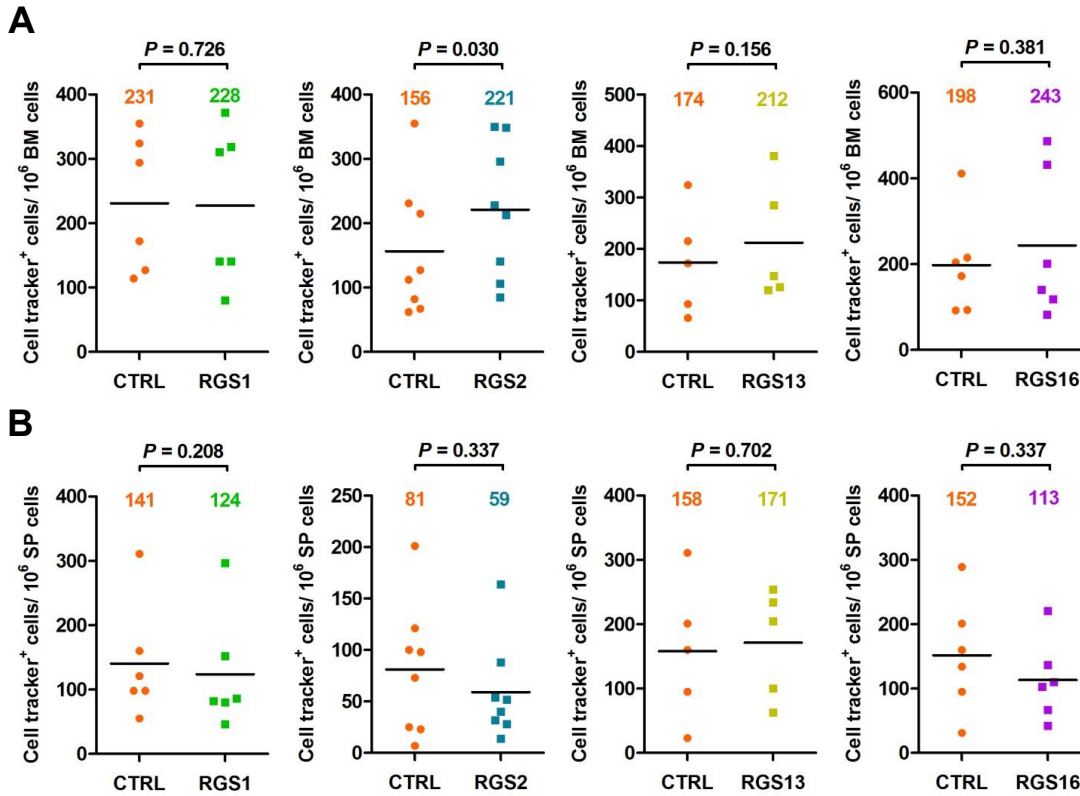

**Supplemental Figure 5. R4 RGS does not influence HSPC homing.** Transduced CD34<sup>+</sup> cells were labeled with CellTracker Deep Red Dye, and infused into sublethally irradiated NOD/SCID mice. Homing of CD34<sup>+</sup> cells to the recipient (A) BM or (B) spleens was enumerated by flow cytometry at 20h post-transplantation. Each data point represents the average homing level of 2 animals in a single experiment, with 5-8 independent experiments performed (*i.e.* 10-16 mice/group). Statistics: two-tailed, paired Student's *t*-test. *P* values are indicated.



## Supplemental Figure 6

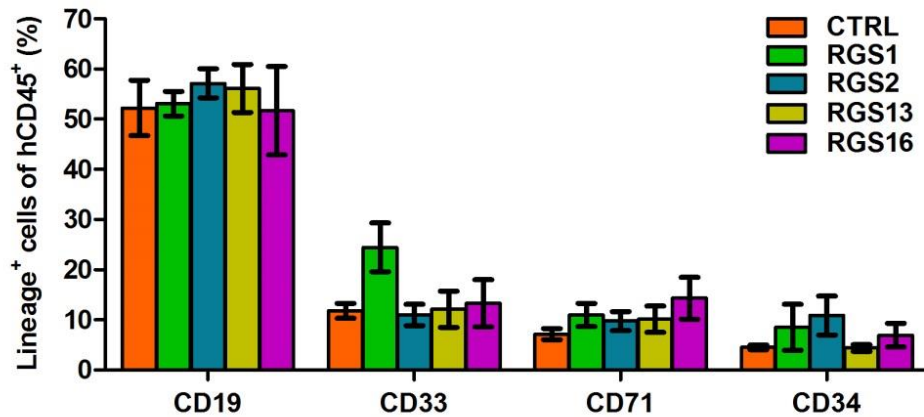

**Supplemental Figure 6. R4 RGS does not bias lineage output.** Control or RGS-overexpressing CD34<sup>+</sup> cells were intravenously infused into sublethally irradiated NOD/SCID mice. In animals with  $\geq 1\%$  engraftment in the BM, human CD45<sup>+</sup> cells were analyzed for lineage compositions (4-5 mice/group). Statistics: two-tailed, paired Student's *t*-test. None of the comparisons achieved statistical significance.

## Supplemental Figure 7

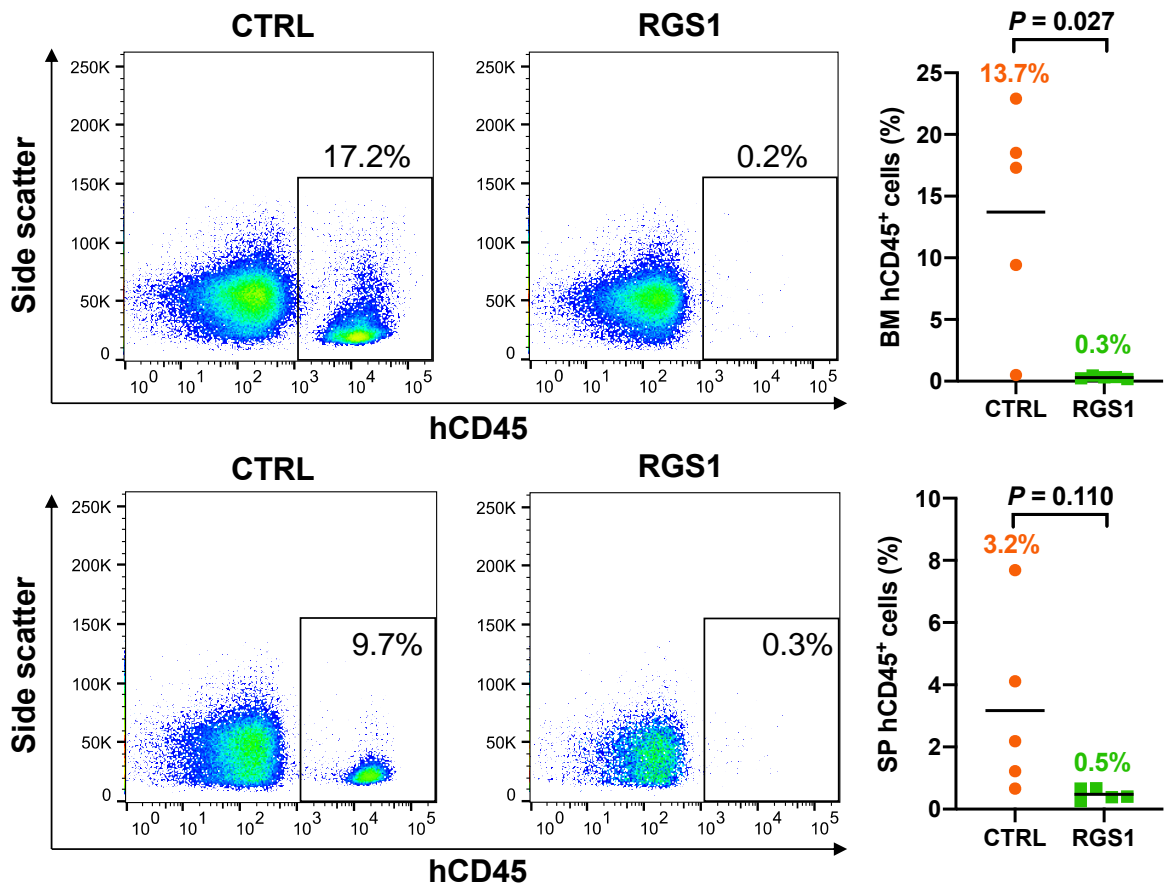

### Supplemental Figure 7. Overexpression of *RGS1* inhibits longer-term HSPC engraftment.

Control or *RGS1*-overexpressing CD34<sup>+</sup> cells were intravenously infused into sublethally irradiated NOD/SCID mice (5 animals/group). Human CD45<sup>+</sup> cells in the recipient BM and spleens were enumerated by flow cytometry at 16 weeks post-transplantation. Statistics: two-tailed, paired Student's *t*-test. *P* values are indicated.

## Supplemental Figure 8

A

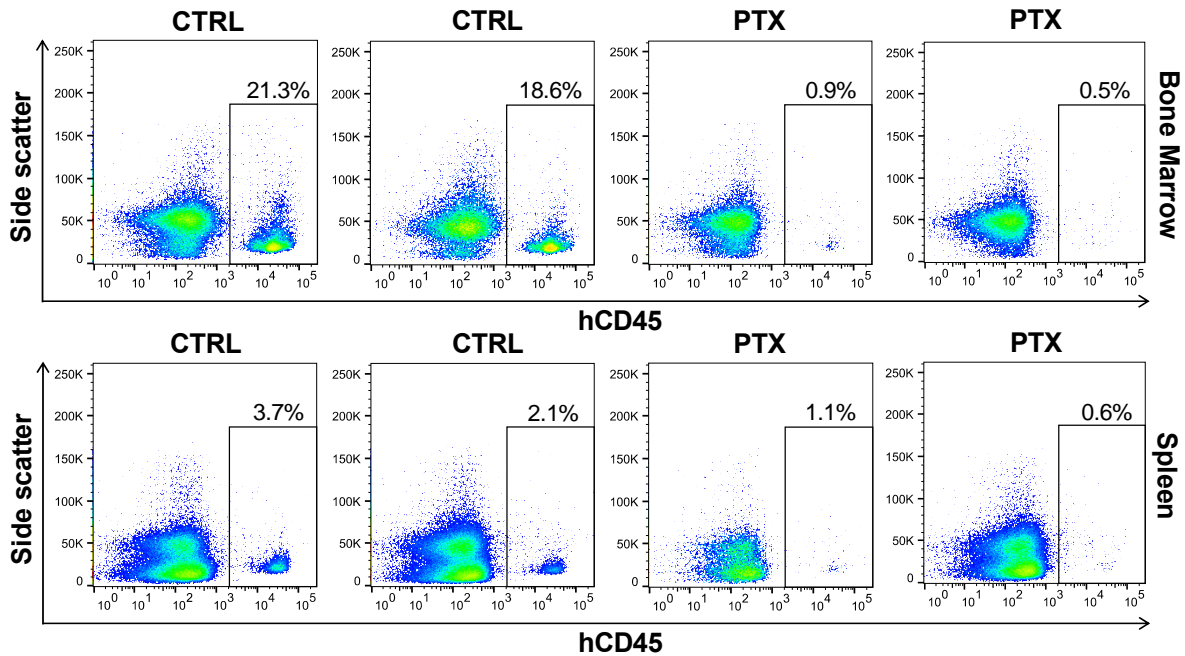

B

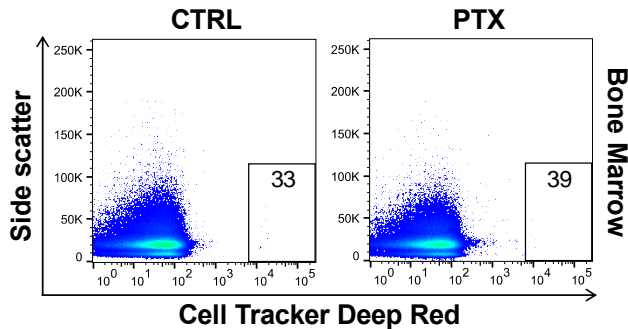

### Supplemental Figure 8. Pertussis toxin inhibits HSPC engraftment but not homing. (A)

CD34<sup>+</sup> cells were treated with medium or PTX (1  $\mu$ g/mL, 1h), and intravenously infused into sublethally irradiated NOD/SCID mice (2 animals/group). Human CD45<sup>+</sup> cells in the recipient BM and spleens were measured by flow cytometry at 8 weeks post-transplantation. (B) Homing of PTX-treated CD34<sup>+</sup> cells at 20h post-transplantation. Reported values are Cell Tracker Deep Red<sup>+</sup> cells/10<sup>6</sup> BM cells.

## Supplemental Figure 9

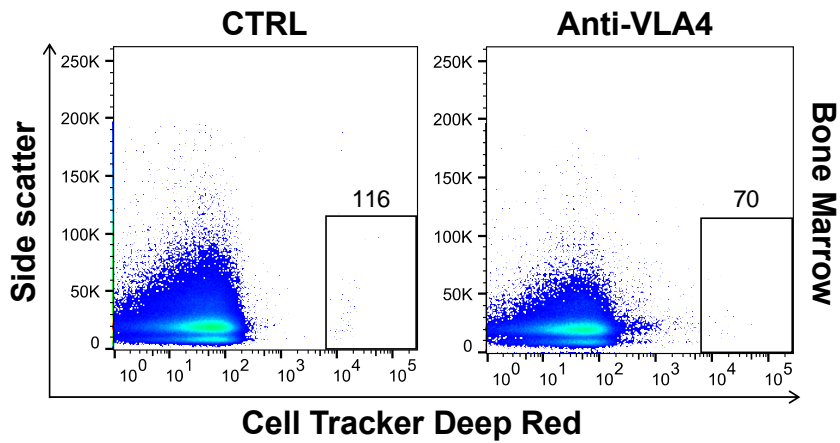

**Supplemental Figure 9. Integrin blockade inhibits HSPC homing.** CD34<sup>+</sup> cells were labeled with Cell Tracker Deep Red, and treated with IgG<sub>1</sub> control or anti-VLA4 (20 µg/mL, 1h) before infusion into sublethally irradiated NOD/SCID mice. Homed cells were detected in the recipient BM at 20h post-transplantation. Reported values are Cell Tracker<sup>+</sup> cells/10<sup>6</sup> BM cells.

## Supplemental Figure 10

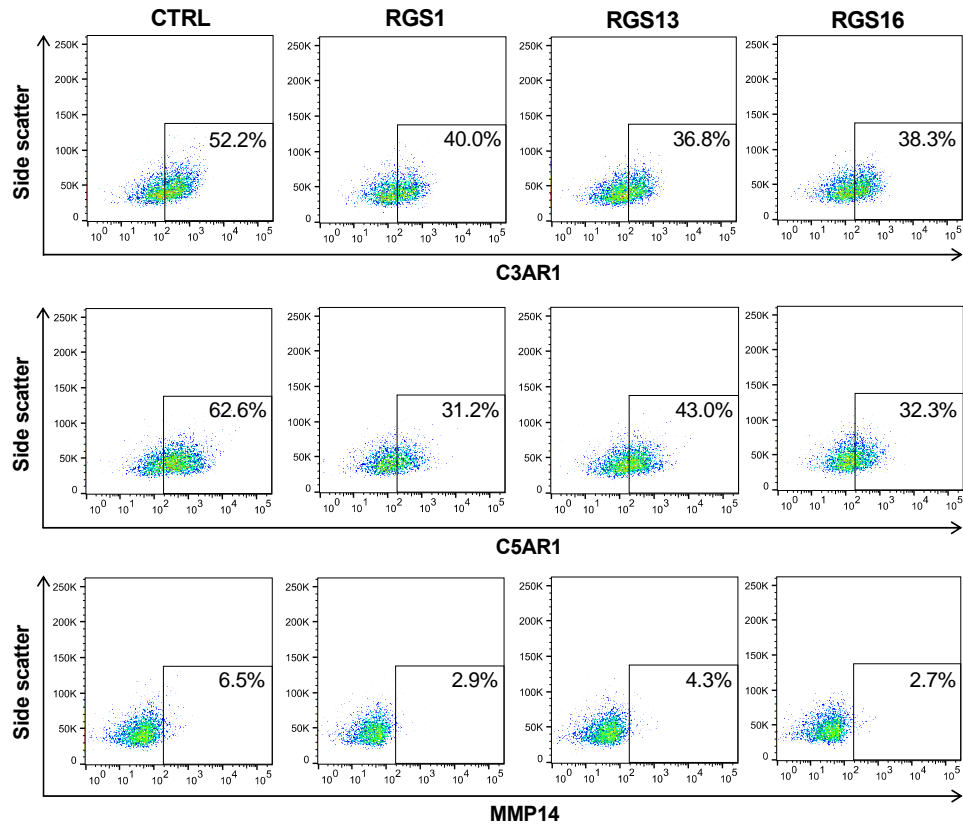

**Supplemental Figure 10. R4 RGS decreases the protein expression of downstream effectors.** Representative flow cytometry plots showing the cell surface expression of C3AR1, C5AR1 and MMP14 on RGS-transduced CD34<sup>+</sup> cells.

## Supplemental Figure 11

A

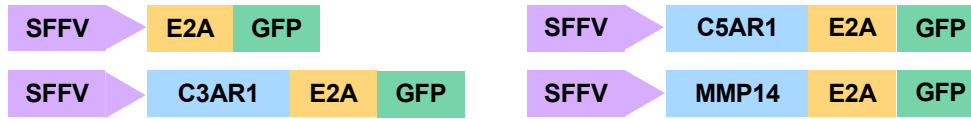

B

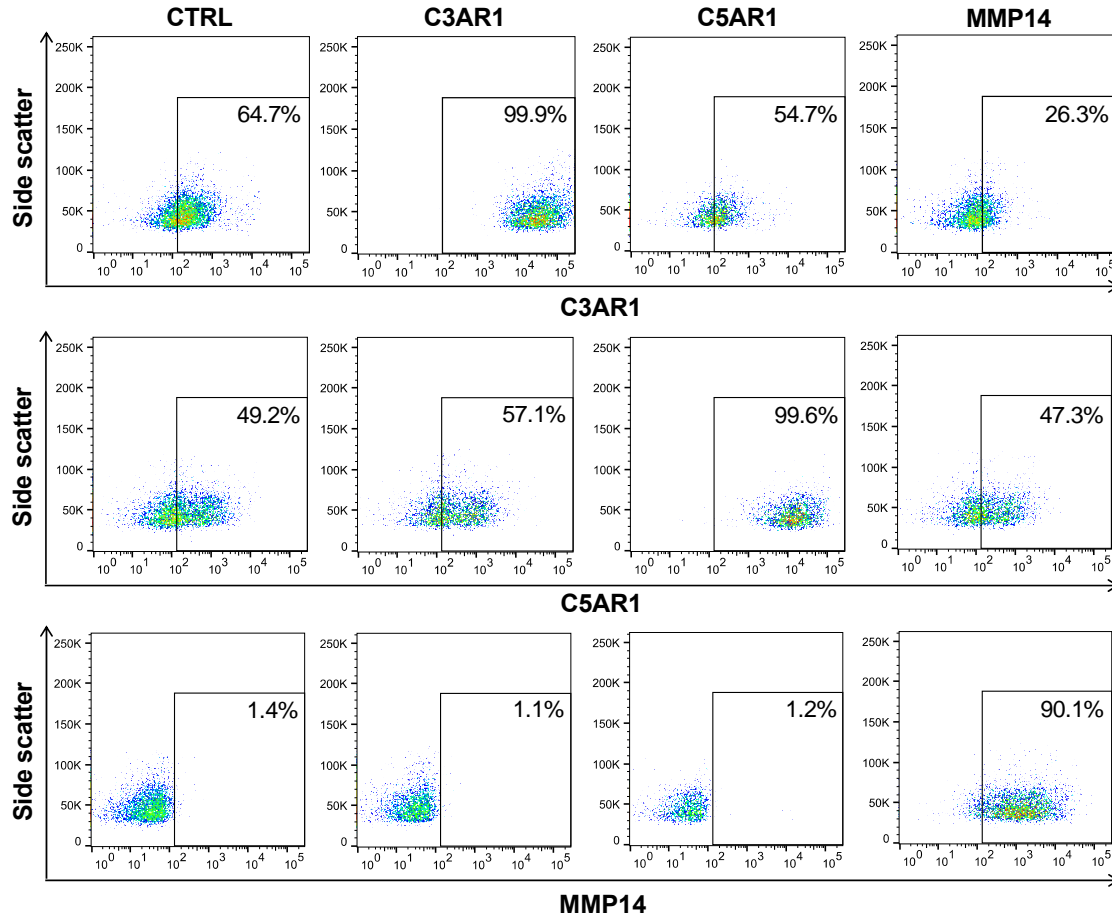

**Supplemental Figure 11. Lentiviral transduction of RGS downstream effectors in CD34<sup>+</sup> cells.** (A) Schematic diagrams showing the lentiviral vector backbone for C3AR1, C5AR1 and MMP14 overexpression. (B) Representative flow cytometry plots showing the specific overexpression of target proteins on transduced CD34<sup>+</sup> cells.

## Supplemental References

1. Reza R, Mastellos D, Majka M, et al. Functional receptor for C3a anaphylatoxin is expressed by normal hematopoietic stem/progenitor cells, and C3a enhances their homing-related responses to SDF-1. *Blood*. 2003;101:3784-3793.
2. Ratajczak J, Reza R, Kucia M, et al. Mobilization studies in mice deficient in either C3 or C3a receptor (C3aR) reveal a novel role for complement in retention of hematopoietic stem/progenitor cells in bone marrow. *Blood*. 2004;103:2071-2078.
3. Wysoczynski M, Reza R, Lee H, Wu W, Ratajczak J, Ratajczak MZ. Defective engraftment of C3aR<sup>-/-</sup> hematopoietic stem progenitor cells shows a novel role of the C3a-C3aR axis in bone marrow homing. *Leukemia*. 2009;23:1455-1461.
4. Lee HM, Wu W, Wysoczynski M, et al. Impaired mobilization of hematopoietic stem/progenitor cells in C5-deficient mice supports the pivotal involvement of innate immunity in this process and reveals novel promobilization effects of granulocytes. *Leukemia*. 2009;23:2052-2062.
5. Jalili A, Shirvaikar N, Marquez-Curtis L, et al. Fifth complement cascade protein (C5) cleavage fragments disrupt the SDF-1/CXCR4 axis: further evidence that innate immunity orchestrates the mobilization of hematopoietic stem/progenitor cells. *Exp Hematol*. 2010;38:321-332.
6. Bishop B, Lloyd CM. CC chemokine ligand 1 promotes recruitment of eosinophils but not Th2 cells during the development of allergic airways disease. *J Immunol*. 2003;170:4810-4817.
7. Schaeferli P, Ebert L, Willmann K, et al. A skin-selective homing mechanism for human immune surveillance T cells. *J Exp Med*. 2004;199:1265-1275.

8. Cantor J, Haskins K. Recruitment and activation of macrophages by pathogenic CD4 T cells in type 1 diabetes: evidence for involvement of CCR8 and CCL1. *J Immunol.* 2007;179:5760-5767.
9. Li X, Syrovets T, Paskas S, Laumonnier Y, Simmet T. Mature dendritic cells express functional thrombin receptors triggering chemotaxis and CCL18/pulmonary and activation-regulated chemokine induction. *J Immunol.* 2008;181:1215-1223.
10. Fraigneau S, Monvoisin A, Clarhaut J, et al. The vitamin K-dependent anticoagulant factor, protein S, inhibits multiple VEGF-A-induced angiogenesis events in a Mer- and SHP2-dependent manner. *Blood.* 2012;120:5073-5083.
11. Li SS, Liu Z, Uzunel M, Sundqvist KG. Endogenous thrombospondin-1 is a cell-surface ligand for regulation of integrin-dependent T-lymphocyte adhesion. *Blood.* 2006;108:3112-3120.
12. Liu Z, Morgan S, Ren J, et al. Thrombospondin-1 (TSP1) contributes to the development of vascular inflammation by regulating monocytic cell motility in mouse models of abdominal aortic aneurysm. *Circ Res.* 2015;117:129-141.
13. Vagima Y, Avigdor A, Goichberg P, et al. MT1-MMP and RECK are involved in human CD34<sup>+</sup> progenitor cell retention, egress, and mobilization. *J Clin Invest.* 2009;119:492-503.
14. Nishida C, Kusubata K, Tashiro Y, et al. MT1-MMP plays a critical role in hematopoiesis by regulating HIF-mediated chemokine/cytokine gene transcription within niche cells. *Blood.* 2012;119:5405-5416.
15. Nakajima H, Ito M, Smookler DS, et al. TIMP-3 recruits quiescent hematopoietic stem cells into active cell cycle and expands multipotent progenitor pool. *Blood.* 2010;116:4474-4482.
16. Shen Y, Winkler IG, Barbier V, Sims NA, Hendy J, Levesque JP. Tissue inhibitor of



- metalloproteinase-3 (TIMP-3) regulates hematopoiesis and bone formation in vivo. *PLoS One*. 2010;5:e13086.
17. Kalaszczynska I, Geng Y, Iino T, et al. Cyclin A is redundant in fibroblasts but essential in hematopoietic and embryonic stem cells. *Cell*. 2009;138:352-365.
  18. Miftakhova R, Hedblom A, Batkiewicz L, et al. Cyclin A1 regulates the interactions between mouse haematopoietic stem and progenitor cells and their niches. *Cell Cycle*. 2015;14:1948-1960.
  19. Spiegel A, Zcharia E, Vagima Y, et al. Heparanase regulates retention and proliferation of primitive Sca-1<sup>+</sup>/c-Kit<sup>+</sup>/Lin<sup>-</sup> cells via modulation of the bone marrow microenvironment. *Blood*. 2008;111:4934-4943.
  20. Smith SG, Gugilla A, Mukherjee M, et al. Thymic stromal lymphopoietin and IL-33 modulate migration of hematopoietic progenitor cells in patients with allergic asthma. *J Allergy Clin Immunol*. 2015;135:1594-1602.
  21. Kostic I, Fidalgo-Carvalho I, Aday S, et al. Lysophosphatidic acid enhances survival of human CD34<sup>+</sup> cells in ischemic conditions. *Sci Rep*. 2015;5:16406.
  22. Nilsson SK, Johnston HM, Whitty GA, et al. Osteopontin, a key component of the hematopoietic stem cell niche and regulator of primitive hematopoietic progenitor cells. *Blood*. 2005;106:1232-1239.
  23. Grassinger J, Haylock DN, Storan MJ, et al. Thrombin-cleaved osteopontin regulates hemopoietic stem and progenitor cell functions through interactions with  $\alpha_9\beta_1$  and  $\alpha_4\beta_1$  integrins. *Blood*. 2009;114:49-59.
